# Supplementary material for: Self-sacrificial templated-directed synthesis of an ultrathin 0D/2D FeNi3-NC/NiFeOx Schottky junction as a hydrogen evolution reaction electrode for alkaline seawater electrolysis
Source: Royal Society of Chemistry journal article supplement (doi:10.1039/d4nj01321b), 2024-01-01
Supplement: d4nj01321b1.pdf [file d4nj01321b1.pdf]

## ***Supporting Information for***

### **Self-Sacrificial templated-directed synthesis of ultrathin 0D/2D FeNi<sub>3</sub>-NC/NiFeO<sub>x</sub> Schottky junction as hydrogen evolution reaction electrode for alkaline seawater electrolysis**

*Zili Xu,<sup>ab#</sup> Yuankang Bao,<sup>ab#</sup> Xun Xu,<sup>ab\*</sup> Ping Li,<sup>ab</sup> Hao Zhang,<sup>a</sup> Deliang Li,<sup>a</sup> Shuwang  
Duo,<sup>ab\*</sup>*

<sup>a</sup> *Jiangxi Key Laboratory of Surface Engineering, Jiangxi Science and Technology  
Normal University, Nanchang, 330013, China*

<sup>b</sup> *School of Materials and Energy, Jiangxi Science and Technology Normal University,  
Nanchang 330013, China*

*\*Corresponding author.*

*E-mail address: rozen121@163.com (Xun Xu), swduo@126.com (Shuwang Duo)*

*# These authors contributed equally to this work.*

# 1、 Electrochemical measurement details

## 1.1 Preparation of alkaline seawater

Natural seawater is collected from Beishan Bay Beach in Shantou City, Guangdong Province (116.769°E, 23.315°N). The preparation method for alkaline seawater involves creating 1M KOH by using the supernatant of natural seawater after it has settled as deionized water.

## 1.2 RepARATION of Pt/C, RuO<sub>2</sub> and Ni(R) electrodes

10 mg 20wt.%Pt/C, 400μl ultra-pure water, 540μl ethanol and 60μl Nafion were mixed together for 0.5 hours to form a homogeneous ink. Then, the ink was dripped onto the IF and allowed to dry naturally at room temperature to obtain Pt/C electrodes. The preparation method for the RuO<sub>2</sub> electrode is the same as described above. 10 mg raney nickel, 400μl ultra-pure water, 540μl ethanol and 60μl Nafion were mixed together for 0.5 hours to form a homogeneous ink. The ink was dripped onto the NF and allowed to dry naturally at room temperature to obtain the raney nickel catalyst electrodes.

## 1.3 Electrochemical measurements

Electrochemical measurements were performed on an electrochemical workstation (Shanghai Chenhua CHI660e) with an electrolytic cell. A three-electrode system was used, with a mercury/mercury oxide electrode serving as the reference electrode, a stone mill rod as the counter electrode, and the synthesized sample as the working electrode. 1M KOH + natural seawater was used as the electrolyte, and the

pH value of the electrolyte was measured using a pH meter. Before all electrochemical tests were prepared, the working electrode was activated through 50 cycles of cyclic voltammetry (CV) scanning in the range of 0.1 to -0.7 V vs. RHE. Additionally, a linear sweep voltammetry (LSV) curve was obtained at a sweep rate of 5 mV s<sup>-1</sup>. The double layer capacitance (C<sub>dl</sub>) is determined by utilizing cyclic voltammetry to measure the disparity in current density. The open circuit potential is ±0.05 V vs. RHE at intervals of 10 mV s<sup>-1</sup> from 10 mV s<sup>-1</sup> to 50 mV s<sup>-1</sup>. Electrochemical impedance spectroscopy (EIS) is tested in the frequency range from 0.01 to 100,000 Hz with an amplitude of 5 mV.

#### 1.4 The substrates and FeNi<sub>3</sub>, NiFeO<sub>x</sub> material complement the details

Iron foam: The thickness is 1.2mm, the purity is 99.9%, from Kunshan Jiayisheng Electronics Co., LTD.

Nickel foam: The thickness is 0.5mm, the purity is 99.9%, from Suzhou Kesheng and metal Materials Co., LTD.

FeNi<sub>3</sub>: Customized by Kunshan Jiayisheng Electronics Co., LTD.

NiFeO<sub>x</sub>: It is obtained by NiFe LDH in argon at 5°C per minute to 280°C, and then at 5°C per minute to 400°C.

#### 1.5 Details of SEM, TEM, or XPS instruments

Scanning electron microscope(SEM): Sigma SEM produced by the German Carl Zeiss Group, electron gun acceleration voltage is 5kV.

Transmission electron microscope(TEM): JEM-2100F model TEM manufactured by Japan JEOL LTD, electron gun acceleration voltage is 300kV.

X-ray Photoelectron Spectroscopy(XPS): The ESCALAB Xi+ model XPS, manufactured by Thermo Fisher Scientific in the United States, the source gun type used is Al K Alpha.

## 2、 Additional figures and table

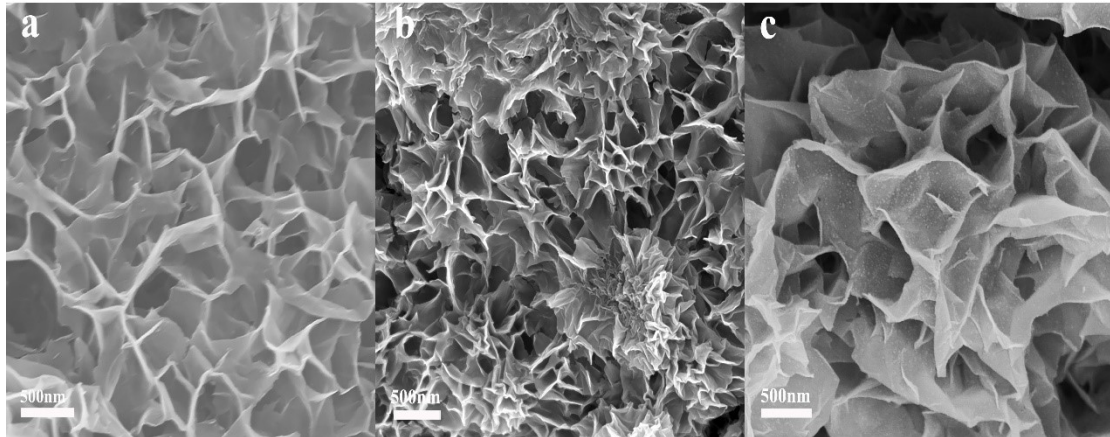

**Figure S1.** SEM image of NiFe-LDH (a) , MOF/NiFeO<sub>x</sub> (b) and FeNi<sub>3</sub>-NC/NiFeO<sub>x</sub>(c).

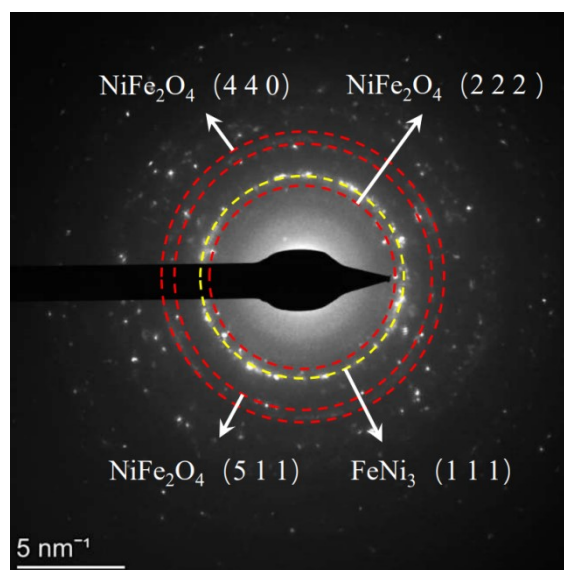

**Figure S2.** The selected-area electron diffraction (SAED) of FeNi<sub>3</sub>-NC/NiFeO<sub>x</sub>.

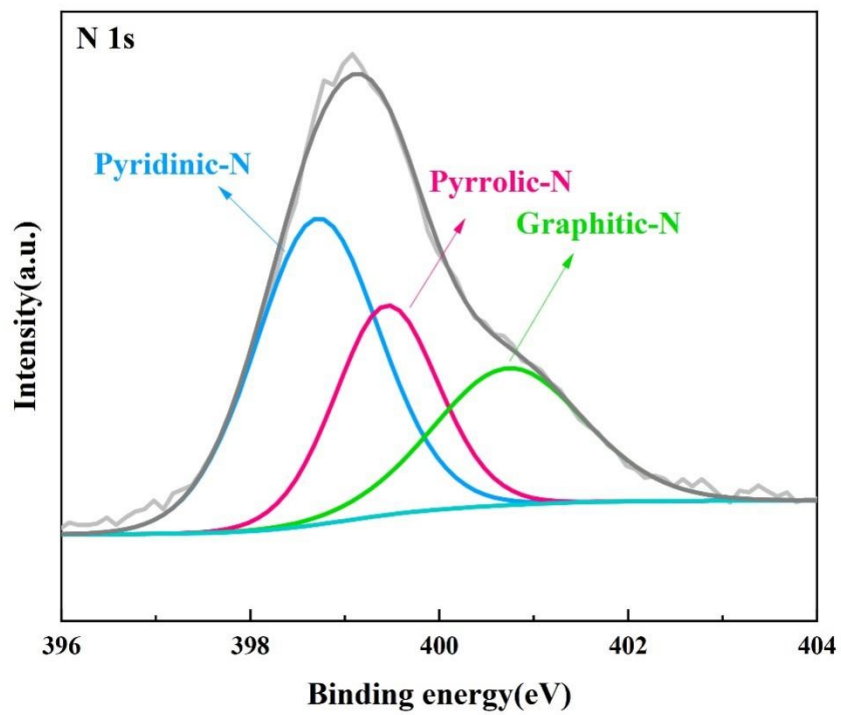

**Figure S3.** XPS spectra of N 1s in FeNi<sub>3</sub>-NC/NiFeO<sub>x</sub>.

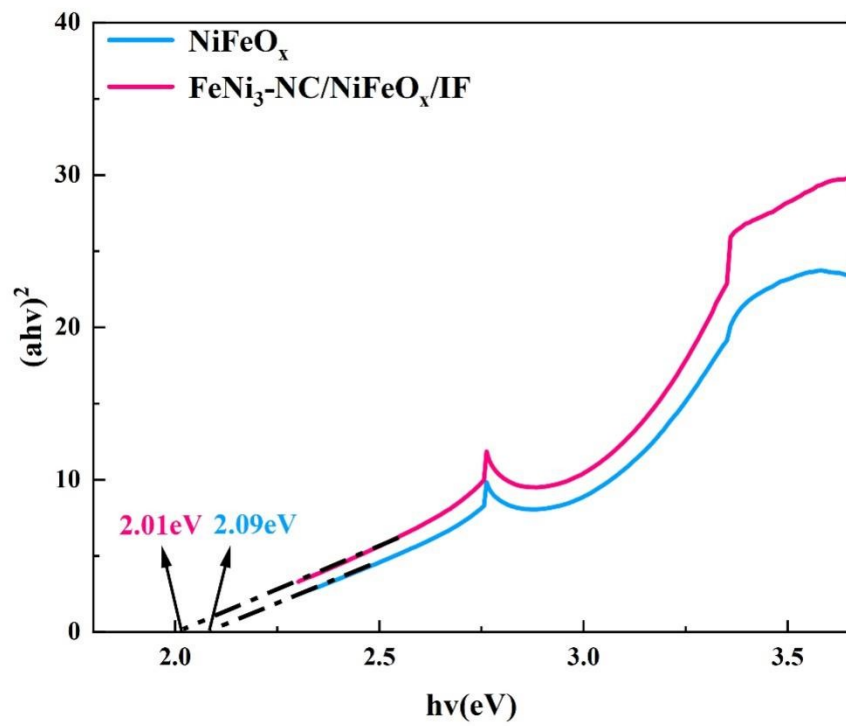

**Figure S4.** Tauc plot of  $\text{NiFeO}_x$   $\text{FeNi}_3\text{-NC/NiFeO}_x$ .



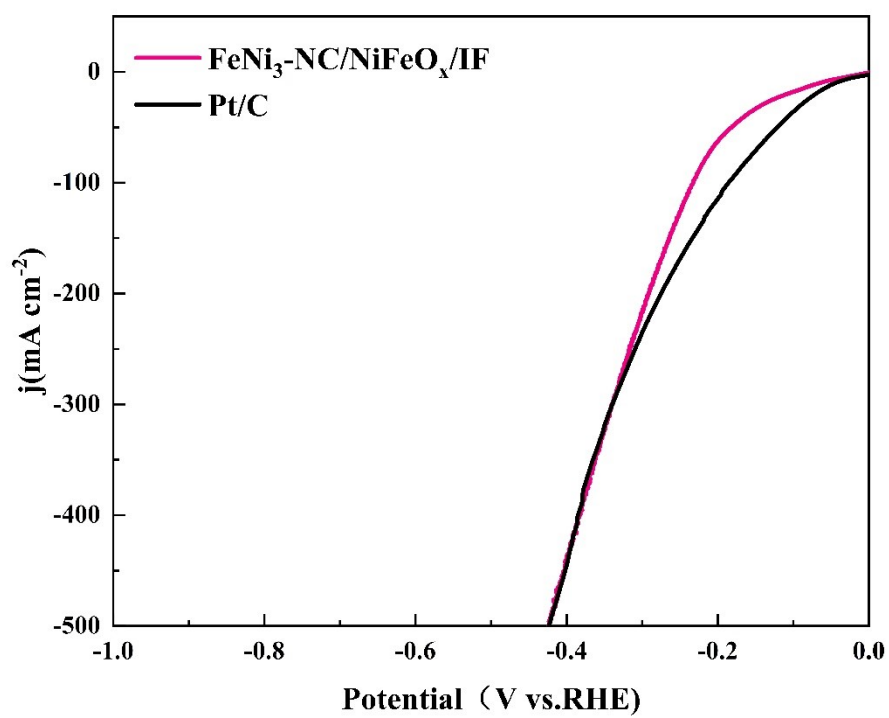

**Figure S5.** LSV curves of  $\text{FeNi}_3\text{-NC/NiFeO}_x$  and Pt/C.

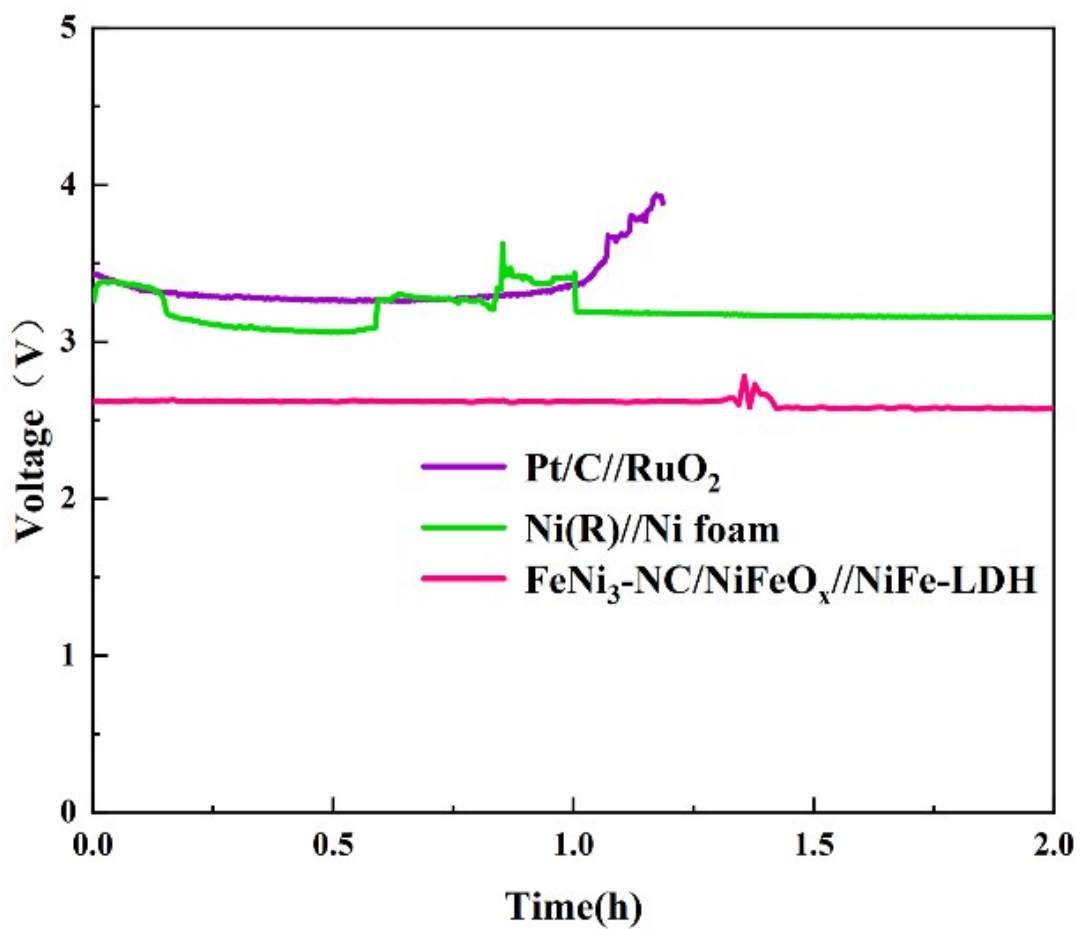

**Figure S6.** Stability comparison of locally enlarged FeNi<sub>3</sub>-NC/NiFeO<sub>x</sub> || NiFe-LDH, Pt/C || RuO<sub>2</sub> and Ni (R) || Ni foam at 500mA cm<sup>-2</sup>.

**Table S1.** This work compares the performance of various HER catalysts in an alkaline solution.

| Catalyst                                 | $\eta$ (mV)<br>@<br>j (mA cm <sup>-2</sup> ) | Stability (h)<br>@<br>j (mA cm <sup>-2</sup> ) | Electrolyte                 | Ref.      |
|------------------------------------------|----------------------------------------------|------------------------------------------------|-----------------------------|-----------|
| FeNi <sub>3</sub> -NC/NiFeO <sub>x</sub> | 65@10<br>232@100                             | 500@500                                        | Alkaline seawater           | This work |
| Ni-SA/NC                                 | 139@10                                       |                                                | Alkaline seawater           | [1]       |
| NiFeP-NS-HER                             | 83@10                                        | 500@100                                        | alkaline simulated seawater | [2]       |
| NiCo@C/MXene                             | 49@10                                        | 140@500                                        | Alkaline seawater           | [3]       |
| Ni <sub>2</sub> P-Fe <sub>2</sub> P      | 252@100                                      | 36@100                                         | Alkaline seawater           | [4]       |
| CoP <sub>x</sub> @FeOOH                  | 117@10                                       | 80@500                                         | Alkaline seawater           | [5]       |
| NiCoP/NiCo-LDH                           | 213@50                                       | 50@15                                          | alkaline simulated seawater | [6]       |
| Co-Fe <sub>2</sub> P                     | 221@100                                      | 22@100                                         | alkaline simulated seawater | [7]       |
| NiFe-LDH/(NiFe)S <sub>x</sub>            | 169@10                                       | 15@10                                          | 1M KOH                      | [8]       |
| CoNiN@NiFe-LDH                           | 150@10                                       | 50@20                                          | 1M KOH                      | [9]       |
| S-NiFeOOH                                | 176@10                                       | 70@500                                         | 1M KOH                      | [10]      |
| NiFe-LDH@Mo-NiS <sub>2</sub> -NiS        | 120@10                                       | 20@10                                          | 1M KOH                      | [11]      |
| NiFeNb-0.25/NF                           | 207@10                                       | 40@10                                          | 1M KOH                      | [12]      |

## Reference:

- [1] Zang W, Sun T, Yang T, et al. Efficient Hydrogen Evolution of Oxidized Ni-N3 Defective Sites for Alkaline Freshwater and Seawater Electrolysis. *Advanced Materials*. 2021;33:2003846.
- [2] Liu J, Liu X, Shi H, et al. Breaking the scaling relations of oxygen evolution reaction on amorphous NiFeP nanostructures with enhanced activity for overall seawater splitting. *Applied Catalysis B: Environmental*. 2022;302:120862.
- [3] Sun F, Qin J, Wang Z, et al. Energy-saving hydrogen production by chlorine-free hybrid seawater splitting coupling hydrazine degradation. *Nature Communications*. 2021;12:4182.
- [4] Wu L, Yu L, Zhang F, et al. Heterogeneous Bimetallic Phosphide Ni<sub>2</sub>P-Fe<sub>2</sub>P as an Efficient Bifunctional Catalyst for Water/Seawater Splitting. *Advanced Functional Materials*. 2020;31:2006484.
- [5] Wu LB, Yu L, McElhenny B, et al. Rational design of core-shell-structured CoP<sub>x</sub>@FeOOH for efficient seawater electrolysis. *Applied Catalysis B-Environmental*. 2021;294:120256.
- [6] Wu Y, Tian Z, Yuan S, et al. Solar-driven self-powered alkaline seawater electrolysis via multifunctional earth-abundant heterostructures. *Chemical Engineering Journal*. 2021;411:128538.
- [7] Wang S, Yang P, Sun X, et al. Synthesis of 3D heterostructure Co-doped Fe<sub>2</sub>P electrocatalyst for overall seawater electrolysis. *Applied Catalysis B: Environmental*. 2021;297:120386.
- [8] Zou Y, Xiao B, Shi J-W, et al. 3D hierarchical heterostructure assembled by NiFe LDH/(NiFe)<sub>Sx</sub> on biomass-derived hollow carbon microtubes as bifunctional electrocatalysts for overall water splitting. *Electrochimica Acta*. 2020;348:136339.
- [9] Wang J, Lv G, Wang C. A highly efficient and robust hybrid structure of CoNiN@NiFe LDH for overall water splitting by accelerating hydrogen evolution kinetics on NiFe LDH. *Applied Surface Science*. 2021;570:151182.
- [10] Kim C, Kim SH, Lee S, et al. Boosting overall water splitting by incorporating sulfur into NiFe (oxy)hydroxide. *Journal of Energy Chemistry*. 2022;64:364-371.
- [11] Li Y, Dai T, Wu Q, et al. Design heterostructure of NiS–NiS<sub>2</sub> on NiFe layered double hydroxide with Mo doping for efficient overall water splitting. *Materials Today Energy*. 2022;23:100906.
- [12] Jiang K, Li Q, Lei S, et al. Nb-doped NiFe LDH nanosheet with superhydrophilicity and superaerophobicity surface for solar cell-driven electrocatalytic water splitting. *Electrochimica Acta*. 2022;429:140947.
